# Supplementary material
Source: HighWire-hosted journal article supplement (https://www.cmajopen.ca/highwire/filestream/85473/field_highwire_adjunct_files/7/2020-0188-original-submission.pdf)

# The Real World Cost-effectiveness of Bariatric Surgery for the Treatment of Severe Obesity

Erica L.W. Lester MD MSc<sup>1</sup>, Raj S. Padwal MD MSc<sup>2</sup>, Daniel W. Birch MD MSc<sup>1</sup>, Arya M. Sharma MD DSc (hon)<sup>2</sup>, Helen So PhD<sup>2</sup>, Feng Ye MSc<sup>2</sup>, Scott W. Klarenbach MD MSc<sup>2</sup>

1. Department of Surgery, University of Alberta, Edmonton, Alberta, Canada
2. Department of Medicine, University of Alberta, Edmonton, Alberta, Canada

Word Count: 2483

Dr Erica L.W Lester  
University of Alberta  
2D2.25 WMC, 8440-112 Street NW  
Edmonton, Alberta  
T6G 2B7  
[elester@ualberta.ca](mailto:elester@ualberta.ca)

1  
2  
3  
4  
5  
6  
7  
8  
9  
10  
11  
12  
13  
14  
15  
16  
17  
18  
19  
20  
21  
22  
23  
24  
25  
26  
27  
28  
29  
30  
31  
32  
33  
34  
35  
36  
37  
38  
39  
40  
41  
42  
43  
44  
45  
46  
47  
48  
49  
50  
51  
52  
53  
54  
55  
56  
57  
58  
59  
60

**ABSTRACT**

Background: Extreme obesity is associated with adverse health outcomes and increased mortality. The ‘real-word’ cost-utility of obesity therapy, from the publicly funded health care system and societal perspectives, is infrequently assessed.

Methods: Decision and Markov models compared medical, surgical and standard care therapies. Primary granular data from a prospective observational cohort of 500 severely obese adults in a regional obesity program over 2 years was extrapolated to 10-year and lifetime models, validated and supplemented with literature sources. Deterministic and probabilistic sensitivity analyses were performed.

Results: From a publicly funded health system perspective, compared to standard care therapy, at 2 years surgical therapy demonstrated an ICUR of \$54,456/QALY. Over a lifetime, it had an ICUR of 14,056/QALY. From the societal perspective, at 2 years surgical therapy demonstrated an ICUR of \$340/QALY: over a lifetime, it was the dominant option. The results were robust to sensitivity analysis.

Conclusions: From a public health care perspective, surgery is cost effective. When approached from a societal perspective, surgery becomes cost saving. These findings, using real-world data, support using surgical therapy for severe obesity, and fill a deficit within the health economic and clinical literature with regards to robust analysis from the social perspective.

## INTRODUCTION

Extreme obesity, defined as a body mass index greater than 35 kg/m<sup>2</sup>, is associated with adverse health outcomes<sup>1-4</sup>, increased health care resource use, and reduced home and workforce productivity. Numerous approaches to treat obesity have been developed, including lifestyle modifications, pharmacotherapies, and surgical interventions.<sup>5-10</sup> Bariatric surgery has emerged as one of the most clinically effective options, with numerous studies demonstrating its effectiveness.<sup>3,11</sup>

While many studies have examined cost-effectiveness from the health payer perspective, a broader perspective that fully captures all the costs and consequences of obesity and its treatment is lacking.<sup>3,12</sup> Failing to consider the societal perspective can underestimate opportunity costs and misdirect resource allocation; this is especially relevant when assessing interventions that increase productivity in a working age patient population, and quality of life. Further, most analyses use data that are estimated from multiple sources, which may not reflect pragmatic, real-world resource use and outcomes. Failure to incorporate factors such as compliance or outcomes of treatment programs outside of a rigorous study protocol may lead to biased estimates of the cost-effectiveness of bariatric treatment programs.

Using prospective, empirical data from a regional bariatric program, we conducted an economic evaluation of surgical and medical therapy compared with standard care from both the public health care system and societal perspectives over 2 years, and extrapolated to 10-year and

lifetime time horizons. This rigorously collected data from a pragmatic clinical treatment program coupled with a broad perspective facilitates the real-world assessment of treatment.

**METHODS**

Data from The Alberta Population-based Prospective Evaluation of the Quality of Life Outcomes and Economic Impact of Bariatric Surgery (APPLES) study was used to inform this cost-utility analysis. A detailed study protocol, approved by the University of Alberta Health Research Ethics Board (Pro00003594), has been previously published.<sup>5</sup> The 500 obese (BMI > 35 kg/m<sup>2</sup>) adult patients were allocated to three groups: medical therapy, surgical therapy or standard care (a wait-listed standard care group with no direct weight-loss therapy administered, serving as a control group). All patients were deemed surgical candidates, as per the NIH guidelines.<sup>13</sup> Data were captured prospectively at 6, 12, 18 and 24 months after respective therapy commencement, including demographics, anthropometrics, health-related quality of life, medication use, detailed health care resource use through linkage with administrative data, and patient and societal costs including transportation needs, out-of-pocket health related purchases, attendance at work and enrollment in government support programs, captured through patient surveys.

*Statistical Analysis*

*Models*

Outcomes at two years were assessed using primary data from the APPLES study by treatment group.

Markov models using 10-year and lifetime time horizons were created. Patients were allocated to the health states of death, diabetes, hypertension, diabetes and hypertension or no obesity related comorbidity as per the results of the 2-year cohort study, and could transition between states during each one-year cycle. (Figure 1) Baseline characteristics for each treatment arm at the completion of the APPLES study are reported in Table 1, and were applied to the respective health states.

Transition probabilities between health states were obtained from primary data where possible, and otherwise informed by focused literature review (supplementary file 1). The approach to determining probabilities is outlined in supplementary file 2.

### *Utility*

For the 2-year assessment, utility values from the APPLES cohort were used. These were measured using the EQ-5D-3L survey and derived via the USA valuation system.<sup>14</sup> For the 10-year and lifetime models, utility measurements were extrapolated by performing multivariable analysis on the APPLES data and using the resultant regression equation to calculate the utility associated with each health state by age. The values calculated were validated by comparison to the values collected by the Health Quality Council of Alberta: the values from the APPLES data were minimally and consistently lower than those from the HCQA. While the HCQA data did not differentiate comorbidities, this finding increased our confidence in the extrapolation.

### *Costs*

1  
2  
3  
4  
5  
6  
7  
8  
9  
10  
11  
12  
13  
14  
15  
16  
17  
18  
19  
20  
21  
22  
23  
24  
25  
26  
27  
28  
29  
30  
31  
32  
33  
34  
35  
36  
37  
38  
39  
40  
41  
42  
43  
44  
45  
46  
47  
48  
49  
50  
51  
52  
53  
54  
55  
56  
57  
58  
59  
60

The publicly funded health care system (HCP) and societal perspectives (SP) were defined as per the Canadian Agency for Drugs and Technologies in Health (CADTH) guidelines.<sup>15</sup> The former includes costs to the publicly funded health care system, patients and their families: details concerning cost determinations are contained in supplementary file 2.

The SP is defined by CADTH as the components of the HCP combined with the direct costs to publicly funded services (other than health care) and productivity costs.<sup>15</sup> This was operationalized by adding, to the HCP cost, the costs of income transfer payments (income for disabled persons, disability and employment insurance benefits), as well as cost of productivity loss, as measured by the friction method: details pertaining to these cost determinations are outlined in supplementary file 2.<sup>16</sup>

Beyond 2 years, the cost of each health state was extrapolated using APPLES data, assuming costs observed for a health state in the second year would persist. Assumptions associated with the cost extrapolation are outlined in supplementary file 2.

All costs were expressed in 2016 Canadian dollars. Where health care related costs required adjustment, the health specific CPI was employed.<sup>17</sup> Other costs were adjusted using the Bank of Canada Inflation Calculator.<sup>18</sup>

*Sensitivity Analysis*

In the 2-year model, probabilistic sensitivity analysis (PSA) was conducted using patient level costs and its distributions. Transition probabilities were applied to beta distributions.

In the 10-year and lifetime model, all variables were assessed via one-way sensitivity analysis, comparing surgical or medical therapy to the reference group (standard care) using the ranges displayed in supplementary files 1-3. PSA was also conducted.

PSA was conducted using Monte Carlo simulation with 1000 iterations. Costs and effects were assessed at a discount rate of 5%, with 3% and 0% in sensitivity analysis. All modeling was conducted using Treeage Pro (2018) <sup>19</sup>, and all statistical analysis using Stata 13.<sup>20</sup> Face, internal and external validity were assessed.<sup>21</sup>

## RESULTS

The annual HCP and SP costs and utility estimates for patients by health state are reported in supplementary files 3 and 4 respectively.

The incremental cost utility ratio (ICUR) are reported with standard care as the comparator group. At 2 years, the absolute QALYs were 1.37, 1.56 and 1.69 for standard care, medical and surgical therapy respectively (supplementary file 5). From the HCP, the mean cost of therapy over the 2-year cohort for standard care, medical and surgical therapy was 8037, 10591 and 25463 respectively. When compared to standard care therapy, surgical therapy demonstrated an ICUR of \$54,456/QALY. The cost effectiveness acceptability curve (CEAC) is reported in Figure 2, and indicates that at a willingness-to-pay(WTP) value of \$30,000 and above medical therapy is favoured.

1  
2  
3  
4  
5  
6  
7  
8  
9  
10  
11  
12  
13  
14  
15  
16  
17  
18  
19  
20  
21  
22  
23  
24  
25  
26  
27  
28  
29  
30  
31  
32  
33  
34  
35  
36  
37  
38  
39  
40  
41  
42  
43  
44  
45  
46  
47  
48  
49  
50  
51  
52  
53  
54  
55  
56  
57  
58  
59  
60

From the SP, mean costs were 51,016, 39,358 and 51,125 for standard care, medical and surgical therapy respectively (supplementary file 5). Surgical therapy demonstrated an ICUR of \$340/QALY. When compared to standard care, medical therapy was dominant (led to more QALYs with lower costs). The CEAC (Figure 2) indicates that at a WTP value of \$5,000 and above medical therapy is favoured.

Results in the 10-year time horizon model are reported in supplementary file 4. From a HCP, standard care was the lowest cost option. When compared to standard care, medical therapy had an ICUR of \$27,199/QALY, and surgical therapy had an ICUR of \$19,989/QALY.

The results were robust to most parameter changes in 1-way sensitivity analysis. The 15 variables inducing the greatest change in 1-way sensitivity analysis are displayed via tornado diagrams in supplementary file 5. Comparing surgery to standard care, the model is sensitive to the cost of the health states of diabetes and hypertension in standard care patients. The model is also sensitive to the mean initial QALY level of surgical patients, which is obtained directly from the APPLES data. When comparing medical therapy to standard care, the model is most sensitive to changes in the cost of standard care patients with both diabetes and hypertension.

In PSA of the 10-year model, surgical therapy is favoured at WTP thresholds above \$15,000 (Figure 3).



When a SP was used in the 10-year model, medical therapy was the lowest cost option. Standard care was dominated (had higher costs and worse health outcomes), and surgery and medical therapy dominated.

This model was robust to most parameter changes in 1-way sensitivity analysis. Overall results were impacted by the cost of surgical group with no comorbidities: as the cost the care in this group increased, the ICUR for surgery became positive. A similar relationship was seen in the medical patients with both diabetes and hypertension. The results of the deterministic sensitivity analysis are displayed in supplementary file 5.

In PSA, surgical therapy is favoured at WTP thresholds above \$20,000 (Figure 3).

Results in the lifetime horizon model are reported in supplementary file 5. Considering health system costs, the lowest cost option was standard care, however this resulted in the least QALYs. Compared to standard care, surgery had an ICUR of 14,056/QALY, and medical therapy was dominated by surgery (most costly and less effective than surgery).

In 1-way sensitivity analysis the model was sensitive to the cost of having both diabetes and hypertension in the standard care group. When comparing surgery to standard care, surgery became the dominating approach with minimal increases in the cost of this health state. The results of the deterministic sensitivity analysis are displayed in supplementary file 6.

1  
2  
3  
4  
5  
6  
7  
8  
9  
10  
11  
12  
13  
14  
15  
16  
17  
18  
19  
20  
21  
22  
23  
24  
25  
26  
27  
28  
29  
30  
31  
32  
33  
34  
35  
36  
37  
38  
39  
40  
41  
42  
43  
44  
45  
46  
47  
48  
49  
50  
51  
52  
53  
54  
55  
56  
57  
58  
59  
60

In PSA, from the HCP surgical therapy was preferred at WTP threshold above \$12,000 (Figure 4).

Using a SP, surgery was the lowest cost option, with medical and standard care dominated.

In deterministic sensitivity analysis, when comparing surgery to standard care, increasing cost of having no comorbidities in the surgery arm altered the results from surgery dominating to having a positive ICUR. The results of the deterministic sensitivity analysis are displayed in supplementary file 6.

In PSA (Figure 4), surgical therapy is preferred at all WTP values.

**INTERPRETATION**

Using prospectively collected real world data, we calculated the cost and utility of surgical therapy, medical therapy and standard care for the treatment of extreme obesity, from both the public health care system and societal perspectives. We have demonstrated that the perspective taken alters the results of this comparison, with surgical and medical treatment becoming more attractive from the societal perspective. This is most pronounced in the short run; as time progresses, the overarching results begin to converge and surgery emerges as the most cost effective method across a wide range of WTP thresholds. From the societal perspective, surgery becomes the lowest cost option, dominating medical therapy and standard care. Surgery also

exhibits the highest level of utility gains, and therefore increases quality of life more than medical or standard therapy.

Our finding that bariatric surgery is either cost effective or cost saving is congruent with previous published reports.<sup>11,12,22-26</sup> However, many previous studies do not consider the societal perspective; as obesity has effects on many facets of life, failing to take into account the breadth of this impact reduces the applicability of these studies.<sup>3,11,25,26</sup> Moreover, many studies do not consider comparative therapies or real-world data, making this study more informative and valuable for decision makers.<sup>11,12</sup> Finally, application of a lifetime time horizon better reflects the long-term impact of obesity interventions, an approach often not pursued in previous studies.<sup>11</sup>

By creating a 2-year model that directly reflects prospectively collected data, and utilizing each individual's data points in custom distributions, the model incorporates real world heterogeneity and variability, including the costs of surgical complications. This reduces parameter and model uncertainty and increases the validity of the PSA results. In using real-world data to inform long-term models, and sources such as the Framingham risk score and the HCQA to externally validate parameter estimates, parameter uncertainty is reduced.<sup>27</sup>

Conservative assumptions, with regards to the long-term effects of surgery and the impact of untreated or ineffectively treated obesity, likely reduced the magnitude of difference in mortality and comorbidity rates between bariatric surgery and the other treatment arms. This was supported by the deterministic sensitivity analysis: while rarely altering the direction of the

1  
2  
3  
4  
5  
6  
7  
8  
9  
10  
11  
12  
13  
14  
15  
16  
17  
18  
19  
20  
21  
22  
23  
24  
25  
26  
27  
28  
29  
30  
31  
32  
33  
34  
35  
36  
37  
38  
39  
40  
41  
42  
43  
44  
45  
46  
47  
48  
49  
50  
51  
52  
53  
54  
55  
56  
57  
58  
59  
60

ICUR, the magnitude was often sensitive to mortality rates, with at minimum 2 mortality rates presenting in the top 15 most sensitive model parameters in each tornado diagram. Conservative assumptions likely underestimate the cost-effectiveness of bariatric surgery relative to comparators.

The overarching results were generally insensitive to parameter changes. It is noteworthy that the cost of having hypertension and diabetes in the standard care group was, in every one-way sensitivity analysis, either the first or second most sensitive parameter in the model. As reported in supplementary file 2, this parameter has a range of \$53 to \$182,264, with a mean value of \$9513, as calculated from the APPLES data. This mean value is notably higher than most other non-death states, and the broad plausible range likely contributes to its impact on ICUR. From a conceptual standpoint, this emphasizes the impact of the cost of comorbidities on overall costs: reduction in the prevalence of hypertension and diabetes via therapy reduces both health care and societal costs.

**LIMITATIONS**

Several limitations of this work merit consideration. The friction approach was taken to calculate societal costs, as per the CADTH guidelines.<sup>15</sup> Relative to the human capital approach, this may underestimate societal costs: particularly in the standard care and medical groups, as there were greater levels of disability and unemployment in those groups.

Hypertension and diabetes were chosen as health states, as they have been illustrated to be drivers of cost and morality<sup>28,29</sup>. The study omits numerous other health states; for example, sleep apnea or coronary artery disease. As these, and other diagnosis, were present in the population, and the costs of all health care delivery was utilized, it is logical to assume that the costs associated with these diagnoses are included in the analysis, and exist in each treatment arm at the rate that they would coexist with hypertension and/or diabetes. Given the multifaceted nature of obesity, it is impractical to label each possible comorbidity, and the iterative combinations, as health states. Furthermore, the number of probability estimations would increase uncertainties in the model.<sup>30</sup>

The APPLES study was conducted prior to the introduction of pharmaceuticals such as combination naltrexone/bupropion and liraglutide: these will likely impact both cost and outcomes in medical and surgical groups, as they are being used perioperatively and instead of surgery. Future studies will be needed to understand the long-term clinical and economic impact of these technologies.<sup>31-33</sup>

This study was conducted using single center data. While this institution uses up-to-date, multidisciplinary approaches with outcomes comparable to those in the literature, this study does not take into account variation in practise between centers, which may influence cost and outcome.

## CONCLUSION

1  
2  
3  
4  
5  
6  
7  
8  
9  
10  
11  
12  
13  
14  
15  
16  
17  
18  
19  
20  
21  
22  
23  
24  
25  
26  
27  
28  
29  
30  
31  
32  
33  
34  
35  
36  
37  
38  
39  
40  
41  
42  
43  
44  
45  
46  
47  
48  
49  
50  
51  
52  
53  
54  
55  
56  
57  
58  
59  
60

Bariatric surgery resulted in the greatest health-related quality of life gains. From a HCP, surgery is cost effective. From a SP, surgery becomes cost saving. These findings, using real-world data, support using surgical therapy for severe obesity, and fill a deficit within the literature with regards to robust analysis from the social perspective.

**DATA-SHARING STATEMENT**

The APPLES data is proprietary: please contact the corresponding author with questions. All other data points were open source.

**FUNDING STATEMENT**

APPLES was funded by the Canadian Institutes of Health Research (CIHR) Grant Number 86642. ELW Lester was supported be the Alberta Innovates Health Solutions Clinician Fellowship. SW Klarenbach was supported by the Kidney Health Research Chair and the Division of Nephrology at the University of Alberta.

There are no conflicts of interest to declare.

## REFERENCES

1. Padwal RS, Rueda-Clausen CF, Sharma AM, et al. Weight loss and outcomes in wait-listed, medically managed, and surgically treated patients enrolled in a population-based Bariatric program: prospective cohort study. *Med Care*. 2014;52(3):208-215.
2. Rudisill C, Charlton J, Booth HP, Gulliford MC. Are healthcare costs from obesity associated with body mass index, comorbidity or depression? Cohort study using electronic health records. *Clin Obes*. 2016;6(3):225-231.
3. Gulliford MC, Charlton J, Booth HP, et al. In: *Costs and outcomes of increasing access to bariatric surgery for obesity: cohort study and cost-effectiveness analysis using electronic health records*. Southampton (UK)2016.
4. Kitahara CM, Flint AJ, Berrington de Gonzalez A, et al. Association between class III obesity (BMI of 40-59 kg/m<sup>2</sup>) and mortality: a pooled analysis of 20 prospective studies. *PLoS Med*. 2014;11(7):e1001673.
5. Padwal RS, Majumdar SR, Klarenbach S, et al. The Alberta population-based prospective evaluation of the quality of life outcomes and economic impact of bariatric surgery (APPLES) study: background, design and rationale. *BMC Health Serv Res*. 2010;10:284.
6. Arterburn DE, Olsen MK, Smith VA, et al. Association between bariatric surgery and long-term survival. *JAMA*. 2015;313(1):62-70.
7. Information ClfH. *Bariatric Surgery in Canada*. 2014.
8. Schauer PR, Bhatt DL, Kashyap SR. Bariatric surgery versus intensive medical therapy for diabetes. *N Engl J Med*. 2014;371(7):682.
9. Gloy VL, Briel M, Bhatt DL, et al. Bariatric surgery versus non-surgical treatment for obesity. *Br J Sports Med*. 2016;50(4):246.

1  
2  
3  
4  
5  
6  
7  
8  
9  
10  
11  
12  
13  
14  
15  
16  
17  
18  
19  
20  
21  
22  
23  
24  
25  
26  
27  
28  
29  
30  
31  
32  
33  
34  
35  
36  
37  
38  
39  
40  
41  
42  
43  
44  
45  
46  
47  
48  
49  
50  
51  
52  
53  
54  
55  
56  
57  
58  
59  
60

10. Gloy VL, Briel M, Bhatt DL, et al. Bariatric surgery versus non-surgical treatment for obesity: a systematic review and meta-analysis of randomised controlled trials. *BMJ*. 2013;347:f5934.

11. Padwal R, Klarenbach S, Wiebe N, et al. Bariatric surgery: a systematic review of the clinical and economic evidence. *J Gen Intern Med*. 2011;26(10):1183-1194.

12. Borisenko O, Adam D, Funch-Jensen P, et al. Bariatric Surgery can Lead to Net Cost Savings to Health Care Systems: Results from a Comprehensive European Decision Analytic Model. *Obes Surg*. 2015;25(9):1559-1568.

13. Services AH. *Nutrition Guideline bariatric Surgery for Adults*. Edmonton, Alberta 2012.

14. Shaw JW, Johnson JA, Coons SJ. US valuation of the EQ-5D health states: development and testing of the D1 valuation model. *Med Care*. 2005;43(3):203-220.

15. CADTH. *Guidelines for the Economic Evaluation of Health Technologies: Canada*. Ottawa: CADTH;2006.

16. Koopmanschap MA, Rutten FF, van Ineveld BM, van Roijen L. The friction cost method for measuring indirect costs of disease. *J Health Econ*. 1995;14(2):171-189.

17. Canada S. Consumer Price Index, health and personal care. CANSIM. <http://www.statcan.gc.ca/tables-tableaux/sum-som/l01/cst01/econ161j-eng.htm>. Published 2016. Accessed 2016.

18. Canada Bo. Inflation Calculator. <http://www.bankofcanada.ca/rates/related/inflation-calculator/>. Published 2016. Accessed 2016.

19. TreeAge Pro 2018 R. TreeAge Software, Williamstown, MA; software available at <http://www.treeage.com>. In: 2018.



20. 2013 S. Stata Statistical Software: Release 13. College Station, TX: StataCorp LP.  
In:2013.
21. Eddy DM, Hollingworth W, Caro JJ, et al. Model transparency and validation: a report of the ISPOR-SMDM Modeling Good Research Practices Task Force--7. *Value Health*. 2012;15(6):843-850.
22. Borisenko O, Adam D, Funch-Jensen P, et al. Response to the Comment on "Bariatric Surgery can Lead to Net Cost Savings to Health Care Systems: Results from a Comprehensive European Decision Analytic Model". *Obes Surg*. 2015;25(7):1256-1257.
23. Borisenko O, Burdukova E, Hargreaves J, Adam D. Cost-Utility of Bariatric Surgery In France And Germany. *Value Health*. 2015;18(7):A671.
24. Borisenko O, Burdukova E, Hargreaves J, Adam D, Funch-Jensen P. Cost-Utility of Bariatric Surgery In Belgium, Denmark, and Italy. *Value Health*. 2015;18(7):A670-671.
25. Castilla I, Mar J, Valcarcel-Nazco C, Arrospide A, Ramos-Goni JM. Cost-utility analysis of gastric bypass for severely obese patients in Spain. *Obes Surg*. 2014;24(12):2061-2068.
26. Belarbi S, Kusel J, Maruszczak M, Slater D, Thomas MG, Martini O. The Cost-Effectiveness Of Bariatric Surgery In Germany. *Value Health*. 2015;18(7):A393.
27. Echouffo-Tcheugui JB, Batty GD, Kivimaki M, Kengne AP. Risk models to predict hypertension: a systematic review. *PLoS One*. 2013;8(7):e67370.
28. Coleman R HK, Genuine Progress Index. *The Cost of Obesity in Alberta: Summary Report*. Alberta, Canada2010.
29. Anis AH, Zhang W, Bansback N, Guh DP, Amarsi Z, Birmingham CL. Obesity and overweight in Canada: an updated cost-of-illness study. *Obes Rev*. 2010;11(1):31-40.

1  
2  
3  
4  
5  
6  
7  
8  
9  
10  
11  
12  
13  
14  
15  
16  
17  
18  
19  
20  
21  
22  
23  
24  
25  
26  
27  
28  
29  
30  
31  
32  
33  
34  
35  
36  
37  
38  
39  
40  
41  
42  
43  
44  
45  
46  
47  
48  
49  
50  
51  
52  
53  
54  
55  
56  
57  
58  
59  
60

30. Roberts M, Russell LB, Paltiel AD, et al. Conceptualizing a model: a report of the ISPOR-SMDM Modeling Good Research Practices Task Force--2. *Value Health*. 2012;15(6):804-811.

31. Canada O. Prescription Medications. University of Alberta Managing Obesity Web site. <https://obesitycanada.ca/managing-obesity/prescription-medications/>. Published 2020. Accessed2020.

32. Khalil H, Ellwood L, Lord H, Fernandez R. Pharmacological Treatment for Obesity in Adults: An Umbrella Review. *Ann Pharmacother*. 2020:1060028019898912.

33. Camilleri M, Acosta A. Combination Therapies for Obesity. *Metab Syndr Relat Disord*. 2018;16(8):390-394.

Confidential

Table 1: Baseline characteristics of treatment groups upon completion of APPLES study  
(entrance into 10-year and lifetime Models)

|                                    | Standard Care<br>(n=150) | Medical Therapy<br>(n=200) | Surgical Therapy<br>(n=150) | All<br>(n=500) |
|------------------------------------|--------------------------|----------------------------|-----------------------------|----------------|
| Age (mean SD)                      | 45.64 (9.18)             | 45.95 (10.01)              | 45.53 (9.49)                | 45.73((9.60)   |
| BMI (mean SD)<br>kg/m <sup>2</sup> | 48.83(8.04)              | 46.54(8.17)                | 36.36(7.57)                 | 44.77(9.03)    |
| Sex (%) female                     | 90.67                    | 87.00                      | 87.33                       | 88.20          |
| Hypertension (%)                   | 64.00                    | 59.00                      | 44.00                       | 56.00          |
| Diabetes (%)                       | 47.33                    | 41.50                      | 22.00                       | 37.40          |

Figure 1: 10-year to lifetime time horizon

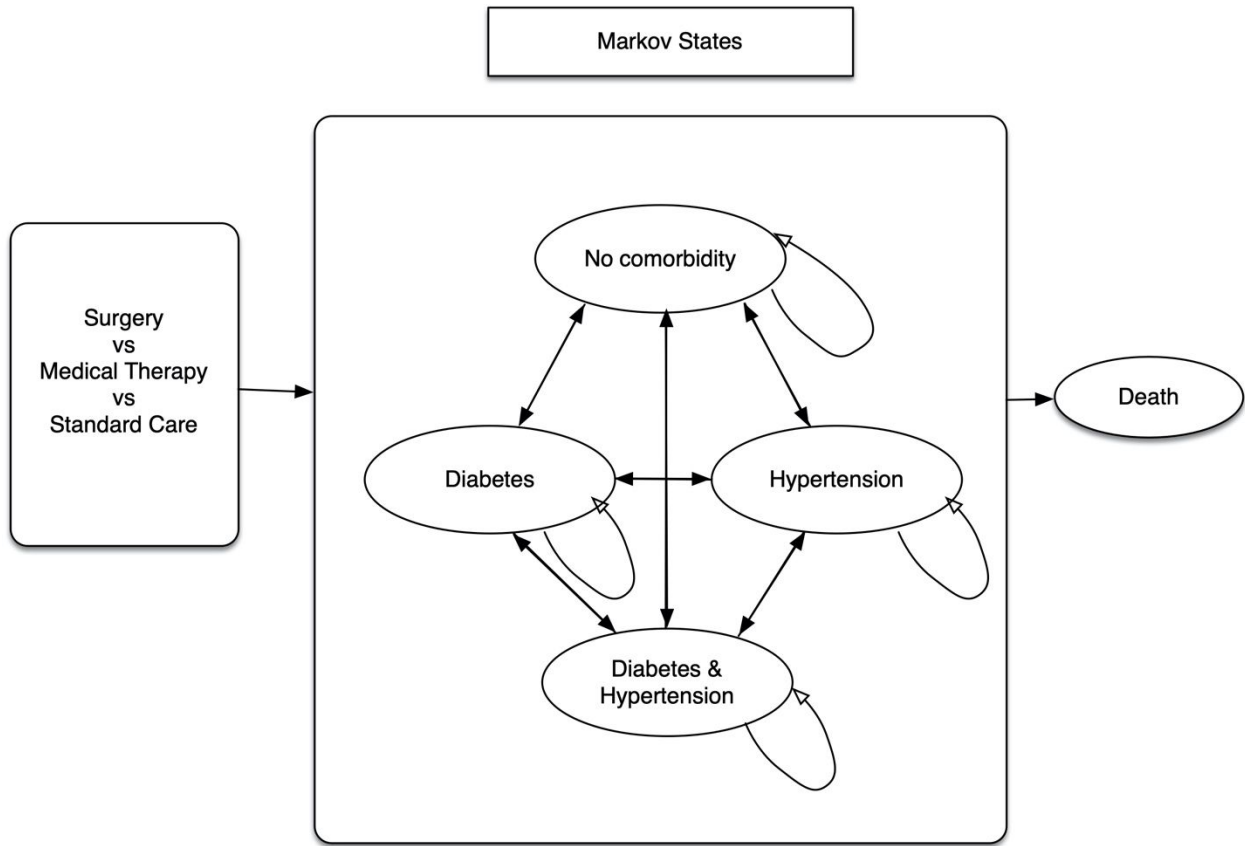

1  
2  
3  
4  
5  
6  
7  
8  
9  
10  
11  
12  
13  
14  
15  
16  
17  
18  
19  
20  
21  
22  
23  
24  
25  
26  
27  
28  
29  
30  
31  
32  
33  
34  
35  
36  
37  
38  
39  
40  
41  
42  
43  
44  
45  
46  
47  
48  
49  
50  
51  
52  
53  
54  
55  
56  
57  
58  
59  
60

Confidential

Figure 2: CEAC for 2-year time horizon from the a) publicly funded health care system and b) societal perspective

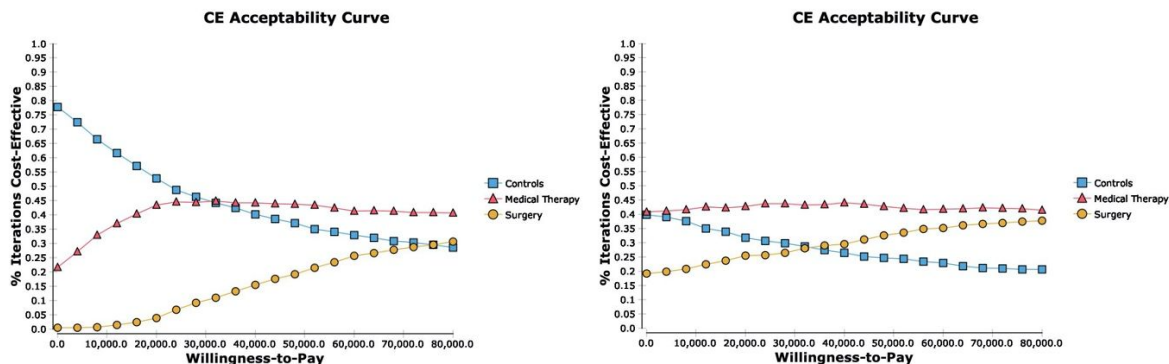

Figure 3: CEAC for 10-year time horizon from the a) publicly funded health care system and b) societal perspective

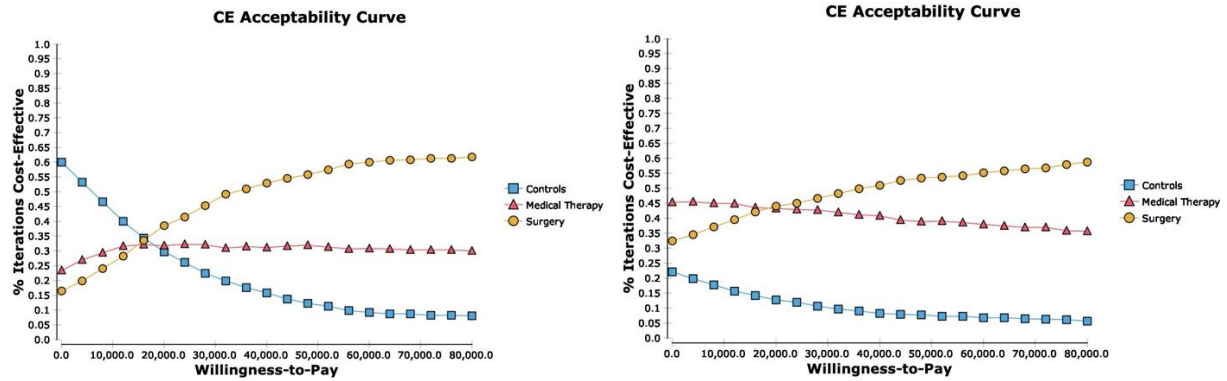

a) publicly funded health care system

b) societal perspective

Figure 4: CEAC for lifetime time horizon from the a) publicly funded health care system and b) societal perspective

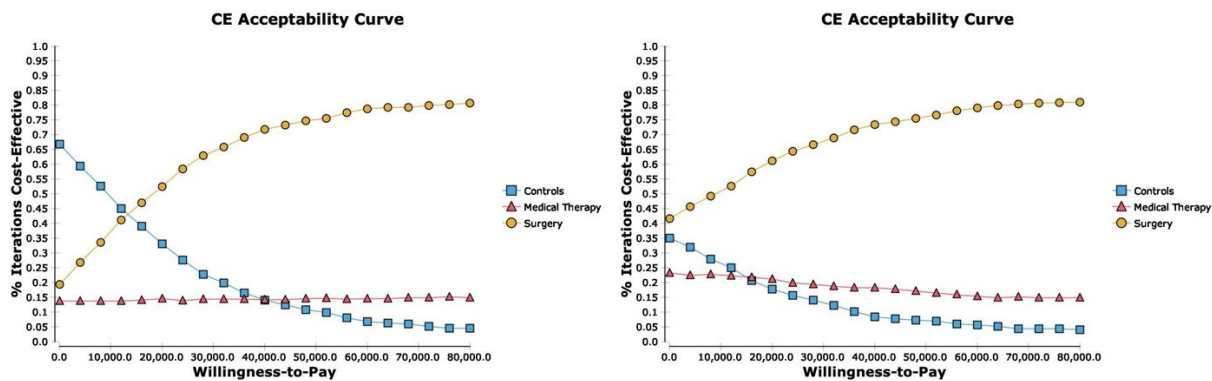

a) publicly funded health care system      b) societal perspective



Table 2: Transition Probabilities for 10-year and Lifetime Models; values listed at age 45 (mean age at first cycle Markov model)

|                               | Risk per annum, value assigned at age 45* | Plausible range | Variables used in determination | Source     | Distribution |
|-------------------------------|-------------------------------------------|-----------------|---------------------------------|------------|--------------|
| Mortality with no comorbidity |                                           |                 |                                 |            |              |
| <i>Surgical</i>               | 0.00137                                   | 0.00130-0.00190 | Age, sex                        | 4, 22, 23  | Lognormal    |
| <i>Medical</i>                | 0.00191                                   | 0.00137-0.00455 | Age, sex                        | 4, 22, 23  | Lognormal    |
| <i>Standard Care</i>          | 0.00274                                   | 0.00137-0.00980 | Age, sex                        | 4, 22, 23  | Lognormal    |
| Mortality with Diabetes       |                                           |                 |                                 |            |              |
| <i>Surgical</i>               | 0.00274                                   | 0.00274-0.00821 | Age, sex                        | 19, 20, 23 | Lognormal    |

|                                                |         |                     |          |                    |           |
|------------------------------------------------|---------|---------------------|----------|--------------------|-----------|
| Medical                                        | 0.00383 | 0.00274-<br>0.0138  | Age, sex | 19, 20, 23         | Lognormal |
| Standard Care                                  | 0.00547 | 0.00274-<br>0.588   | Age, sex | 19, 20, 23         | Lognormal |
| Mortality with<br>Hypertension                 |         |                     |          |                    |           |
| Surgical                                       | 0.00274 | 0.00274-<br>0.0038  | Age, sex | 16, 23, 25, 50     | Lognormal |
| Medical                                        | 0.00383 | 0.00274-<br>0.00460 | Age, sex | 16, 23, 25, 50     | Lognormal |
| Standard Care                                  | 0.00548 | 0.00274-<br>0.196   | Age, sex | 16, 23, 25, 50     | Lognormal |
| Mortality with<br>Diabetes and<br>Hypertension |         |                     |          |                    |           |
| Surgical                                       | 0.00548 | 0.00548-<br>0.164   | Age, sex | 16, 19, 20, 23, 50 | Lognormal |
| Medical                                        | 0.00767 | 0.00548-<br>0.0276  | Age, sex | 16, 19, 20, 23, 50 | Lognormal |
| Standard Care                                  | 0.0110  | 0.00548-<br>1.18    | Age, sex | 16, 19, 20, 23, 50 | Lognormal |
| Diabetes                                       |         |                     |          |                    |           |

|                             |        |                   |                                                           |                      |           |
|-----------------------------|--------|-------------------|-----------------------------------------------------------|----------------------|-----------|
| acquisition                 |        |                   |                                                           |                      |           |
| <i>Surgical</i>             | 0.0077 | 0.0073-<br>0.077  | Age                                                       | 14, 18-20            | Beta      |
| <i>Medical</i>              | 0.0111 | 0.0077-<br>0.200  | Age, BMI                                                  | 14, 19, 20<br>18     | Lognormal |
| <i>Standard Care</i>        | 0.0157 | 0.0077-<br>0.200  | Age, BMI                                                  | 14<br>18-20          | Lognormal |
| Diabetes<br>Resolution      |        |                   |                                                           |                      |           |
| <i>Surgical</i>             | 0.0162 | 0-0.0162          | Age, sex                                                  | 5, 14                | Lognormal |
| <i>Medical</i>              | 0      | 0-0.0162          | -                                                         | 5, 14                | -         |
| <i>Standard Care</i>        | 0      | 0-0.0162          | -                                                         | 5, 14                | -         |
| Hypertension<br>acquisition |        |                   |                                                           |                      |           |
| <i>Surgical</i>             | 0.0245 | 0.0186-<br>0.0245 | Age, sex,<br>blood<br>pressure,<br>smoking<br>status, BMI | 15, 16, 41<br>14, 17 | Weibull   |
| <i>Medical</i>              | 0.0808 | 0.023-0.85        | Age, sex,<br>blood<br>pressure,<br>smoking                | 14-17, 41            | Weibull   |

|                            |                            |                           |                                                           |           |          |
|----------------------------|----------------------------|---------------------------|-----------------------------------------------------------|-----------|----------|
|                            |                            |                           | status, BMI                                               |           |          |
| <i>Standard Care</i>       | 0.0917                     | 0.023-0.85                | Age, sex,<br>blood<br>pressure,<br>smoking<br>status, BMI | 15-17, 41 | Weibull  |
| Hypertension<br>Resolution |                            |                           |                                                           |           |          |
| <i>Surgical</i>            | 4.813<br>x10 <sup>-5</sup> | 0-4.813 x10 <sup>-5</sup> | Age, sex                                                  | 5, 14     | Logistic |
| <i>Medical</i>             | 0                          | 0-4.813 x10 <sup>-5</sup> | -                                                         | 5, 14     | -        |
| <i>Standard Care</i>       | 0                          | 0-4.813 x10 <sup>-5</sup> | -                                                         | 5, 14     | -        |

\* Rates are determined by evidence found in the literature and informed by the primary APPLES data. For instance, mortality tables from Statistics Canada were employed to determine mortality rates, adjusting for the sex, BMI and comorbidity states as determined from the APPLES data. Using the same tables, the rate of mortality increased with increasing age.

## Supplementary file 2: Further Explanation of Methods

### *Transition Probabilities*

The probability of resolution of comorbidities in the surgery arm was extrapolated from the primary data using parametric survival analysis.<sup>14</sup> In the remaining arms of the APPLES cohort, there were too few cases of comorbidity resolution to extrapolate a rate, and the rates of resolution were set to zero. The finding were supported by the results of the SOS study.<sup>14</sup>

The APPLES study reported the prevalence of hypertension at 2 years, however *de novo* or recurrent hypertension may subsequently occur. The probability of acquiring hypertension was estimated using the externally validated Framingham risk regression model<sup>15</sup>, with risk increasing with age. The values estimated were compared to those published by the Public Health Agency of Canada (PHAC) and Shuger et al: the Framingham values were similar estimates.<sup>16,17</sup>

The probability of acquiring diabetes in the surgical group was estimated from the average rate from the SOS and the Canadian population risk. Assuming this is the probability associated with class I obesity, the probability of acquiring diabetes for the medical and standard care groups was calculated by assuming patients experienced risk based on their class of obesity.<sup>18-21</sup>

The probability of death for each state was estimated using mortality rates for the Canadian population, adjusting for sex ratio and allowing the risk to increase with age in each successive

1  
2  
3 Markov cycle. The relative risks associated with BMI and comorbidity, as published in the  
4 literature, were applied to these mortality rates accordingly.<sup>4,16,19,20,22,23</sup> The baseline risk of  
5 mortality was used for the surgical group, and conservative values for the increased risks  
6 associated with the BMI were congruently applied to the medical and standard care groups. This  
7 likely results in a conservative estimate of mortality.<sup>24</sup> The risk associated with the surgical  
8 health states was applied as the lowest bound for the plausible ranges of the medical and standard  
9 care parameters.

10  
11  
12  
13  
14  
15  
16  
17  
18  
19  
20  
21 *Costs*

22  
23  
24 *Publicly funded health care system perspective*

25  
26 To operationalize the publicly funded health care system costs, the costs of all hospitalizations,  
27 ambulatory care episodes, and physician billings obtained from linked administrative data were  
28 combined with patient out-of-pocket costs, including transport, assistance, household care,  
29 personal care, mobility aids, meal replacements, physical trainers, exercise/diet/nutrition  
30 programs, private nursing care, physical, occupational and respiratory therapy and other, as  
31 recorded at each study visit. Prescription and over-the-counter medication use was recorded and  
32 costs based on the lowest-cost formulary alternative were assigned.

33  
34  
35  
36  
37  
38  
39  
40  
41  
42  
43  
44  
45 *Societal perspective*

46  
47 The friction cost was determined from the mean length of unemployment in Canada and mean  
48 wage, in 2016.<sup>28</sup> If patients were unemployed for two separate periods in a year, only one friction  
49 period was applied. A friction period was applied if the patient reported being unemployed or on  
50 short or long-term disability: for those on long-term disability, the friction cost was applied only

once. For the standard care, medical and surgical groups, the percent of persons incurring a friction cost was 40%, 35% and 17%, respectively.

#### *Cost Extrapolation beyond 2-year APPLES study*

It was assumed that patients were discharged from the obesity management clinic after 2 years, and as such the ambulatory care and physician billings associated with the program ceased. As there were no deaths in the surgery arm, the cost associated with death in the medical therapy arm was applied. With regards to the SP costs, cost of income transfer payments occurred every year until the mean age of retirement in Canada<sup>17</sup>, after which incremental costs were solely health care costs. The costs acquired during the 2-year APPLES study were used as an initial cost, and annual costs were accrued each cycle.

Table 3: Annual cost estimates for 10-year and Lifetime Models; values listed at age 45 (mean age at first cycle of Markov model)

| Estimate                                               | Publicly<br>Funded<br>Health Care<br>System<br>Costs (CDN) | Plausible<br>Range | Societal<br>Perspective<br>Value<br>Assigned<br>(CDN) | Plausible<br>Range | Distribution |
|--------------------------------------------------------|------------------------------------------------------------|--------------------|-------------------------------------------------------|--------------------|--------------|
| Standard care<br>group no<br>comorbidity               | 3236                                                       | 156-6487           | 6587                                                  | 119-20594          | Gamma        |
| Standard care<br>group diabetes                        | 6017                                                       | 767-43772          | 25002                                                 | 602-190926         | Gamma        |
| Standard care<br>group<br>hypertension                 | 4130                                                       | 669-8260           | 8504                                                  | 1137-14936         | Gamma        |
| Standard care<br>group<br>Diabetes and<br>hypertension | 9513                                                       | 53-182264          | 38686                                                 | 204-245017         | Gamma        |
| Standard care<br>group death                           | 13385                                                      | 22915-<br>37788    | 31367                                                 | 31367-54763        | Gamma        |



|                                                    |       |                 |       |             |       |
|----------------------------------------------------|-------|-----------------|-------|-------------|-------|
| Medical<br>Therapy no<br>comorbidity               | 7876  | 85-15627        | 8938  | 198-51125   | Gamma |
| Medical<br>Therapy<br>diabetes                     | 7654  | 646-10208       | 10133 | 735-67097   | Gamma |
| Medical<br>Therapy<br>hypertension                 | 9502  | 1011-30269      | 9830  | 1295-43490  | Gamma |
| Medical<br>Therapy<br>Diabetes and<br>hypertension | 9513  | 346-37918       | 12540 | 346-65370   | Gamma |
| Medical<br>Therapy death                           | 27296 | 22915-<br>37788 | 45602 | 40296-54763 | Gamma |
| Surgical<br>Therapy no<br>comorbidity              | 7795  | 270-54717       | 12982 | 381-98949   | Gamma |
| Surgical<br>Therapy<br>diabetes                    | 6996  | 1446-47999      | 13703 | 890-55539   | Gamma |

1  
2  
3  
4  
5  
6  
7  
8  
9  
10  
11  
12  
13  
14  
15  
16  
17  
18  
19  
20  
21  
22  
23  
24  
25  
26  
27  
28  
29  
30  
31  
32  
33  
34  
35  
36  
37  
38  
39  
40  
41  
42  
43  
44  
45  
46  
47  
48  
49  
50  
51  
52  
53  
54  
55  
56  
57  
58  
59  
60

|                                                     |       |                 |       |             |       |
|-----------------------------------------------------|-------|-----------------|-------|-------------|-------|
| Surgical<br>Therapy<br>hypertension                 | 6488  | 347-25003       | 10977 | 1034-59779  | Gamma |
| Surgical<br>Therapy<br>Diabetes and<br>hypertension | 7560  | 744-16137       | 10594 | 901-27783   | Gamma |
| Surgical<br>Therapy death                           | 27296 | 22915-<br>37788 | 45602 | 40296-54763 | Gamma |

Table 4. Utility estimates for 10-year and Lifetime Models; values listed at age 45 (mean age at first cycle Markov model)

| Utility                                                | Value assigned | Plausible range | Distribution |
|--------------------------------------------------------|----------------|-----------------|--------------|
| Standard care<br>group no<br>comorbidity               | 0.694          | 0.308-1.00      | Beta         |
| Standard care<br>group diabetes                        | 0.642          | 0.376-1.00      | Beta         |
| Standard care<br>group<br>hypertension                 | 0.724          | 0.204-1.00      | Beta         |
| Standard care<br>group<br>Diabetes and<br>hypertension | 0.683          | 0.167-1.00      | Beta         |
| Medical Therapy<br>no comorbidity                      | 0.782          | 0.678-1.00      | Beta         |
| Medical Therapy<br>diabetes                            | 0.765          | 0.378-1.00      | Beta         |
| Medical Therapy<br>hypertension                        | 0.782          | 0.263-1.00      | Beta         |

1  
2  
3  
4  
5  
6  
7  
8  
9  
10  
11  
12  
13  
14  
15  
16  
17  
18  
19  
20  
21  
22  
23  
24  
25  
26  
27  
28  
29  
30  
31  
32  
33  
34  
35  
36  
37  
38  
39  
40  
41  
42  
43  
44  
45  
46  
47  
48  
49  
50  
51  
52  
53  
54  
55  
56  
57  
58  
59  
60

|                                                     |       |              |      |
|-----------------------------------------------------|-------|--------------|------|
| Medical Therapy<br>Diabetes and<br>hypertension     | 0.765 | -0.0402-1.00 | Beta |
| Surgical<br>Therapy no<br>comorbidity               | 0.838 | 0.463-1.00   | Beta |
| Surgical<br>Therapy diabetes                        | 0.821 | 0.271-1.00   | Beta |
| Surgical<br>Therapy<br>hypertension                 | 0.838 | 0.271-1.00   | Beta |
| Surgical<br>Therapy<br>Diabetes and<br>hypertension | 0.821 | 0.204-1.00   | Beta |
| Death                                               | 0     | 0            | -    |

Table 5: 2-year, 10 year and lifetime time horizon results, with standard care as the comparator

|                                                                   | Absolute<br>Cost | Incremental<br>Cost | Absolute<br>QALY<br>gain | Incremental<br>QALY gain | ICUR                                             |
|-------------------------------------------------------------------|------------------|---------------------|--------------------------|--------------------------|--------------------------------------------------|
| <b>2-year Time Horizon</b>                                        |                  |                     |                          |                          |                                                  |
| <b>Publicly<br/>Funded Health<br/>Care System<br/>Perspective</b> |                  |                     |                          |                          |                                                  |
| <i>Standard Care</i>                                              | 8037             | -                   | 1.37                     | -                        | -                                                |
| <i>Medical Therapy</i>                                            | 10591            | 2554                | 1.56                     | 0.19                     | 13,442                                           |
| <i>Surgical<br/>Therapy</i>                                       | 25463            | 17426               | 1.69                     | 0.32                     | 54,456                                           |
| <b>Societal<br/>Perspective</b>                                   |                  |                     |                          |                          |                                                  |
| <i>Standard Care</i>                                              | 51,016           | -                   | 1.37                     | -                        | -                                                |
| <i>Medical Therapy</i>                                            | 39,358           | -11,658             | 1.56                     | 0.19                     | Dominates (less<br>costly and more<br>effective) |
| <i>Surgical<br/>Therapy</i>                                       | 51,125           | 109                 | 1.69                     | 0.32                     | 340                                              |
| <b>10-year Time Horizon</b>                                       |                  |                     |                          |                          |                                                  |

1  
2  
3  
4  
5  
6  
7  
8  
9  
10  
11  
12  
13  
14  
15  
16  
17  
18  
19  
20  
21  
22  
23  
24  
25  
26  
27  
28  
29  
30  
31  
32  
33  
34  
35  
36  
37  
38  
39  
40  
41  
42  
43  
44  
45  
46  
47  
48  
49  
50  
51  
52  
53  
54  
55  
56  
57  
58  
59  
60

|                                                                       |         |         |      |      |          |
|-----------------------------------------------------------------------|---------|---------|------|------|----------|
| <b>Publicly<br/>Funded<br/>Health Care<br/>System<br/>Perspective</b> |         |         |      |      |          |
| <i>Standard<br/>Care</i>                                              | 53,514  | -       | 5.85 | -    | -        |
| <i>Medical<br/>Therapy</i>                                            | 75,332  | 21,818  | 6.66 | 0.8  | 27199    |
| <i>Surgical<br/>Therapy</i>                                           | 80,498  | 26,984  | 7.20 | 1.35 | 19,989   |
| <b>Societal<br/>Perspective</b>                                       |         |         |      |      |          |
| <i>Standard<br/>Care</i>                                              | 204,103 | -       | 5.88 | -    |          |
| <i>Medical<br/>Therapy</i>                                            | 117,603 | -86,500 | 6.68 | 0.8  | Dominant |
| <i>Surgical<br/>Therapy</i>                                           | 134,582 | -69,521 | 7.21 | 1.33 | Dominant |
| <b>Lifetime<br/>Time<br/>Horizon</b>                                  |         |         |      |      |          |

|                                                                       |         |          |       |      |          |
|-----------------------------------------------------------------------|---------|----------|-------|------|----------|
| <b>Publicly<br/>Funded<br/>Health Care<br/>System<br/>Perspective</b> |         |          |       |      |          |
| <i>Standard<br/>Care</i>                                              | 168,217 | -        | 10.41 | -    | -        |
| <i>Medical<br/>Therapy</i>                                            | 260,905 | 92,688   | 12.49 | 2.08 | 44,561   |
| <i>Surgical<br/>Therapy</i>                                           | 227,634 | 59,417   | 14.63 | 4.22 | 14,056   |
| <b>Societal<br/>Perspective</b>                                       |         |          |       |      |          |
| <i>Standard<br/>Care</i>                                              | 436,488 | -        | 10.41 |      |          |
| <i>Medical<br/>Therapy</i>                                            | 330,770 | -105,718 | 12.49 | 2.08 | Dominant |
| <i>Surgical<br/>Therapy</i>                                           | 313,162 | -123,326 | 14.63 | 4.22 | Dominant |

Supplementary file 6

10 year Health Care Perspective

Tornado Diagram – ICER  
Surgery vs. Controls

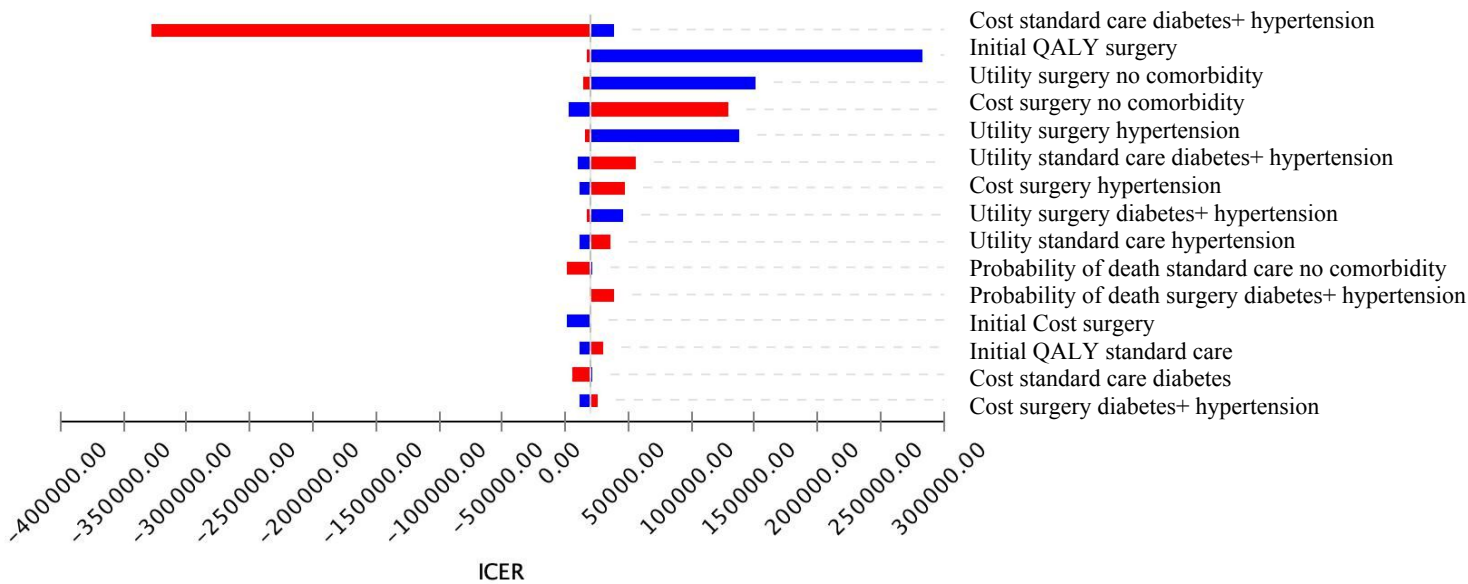



# Tornado Diagram – ICER Medical Therapy vs. Controls

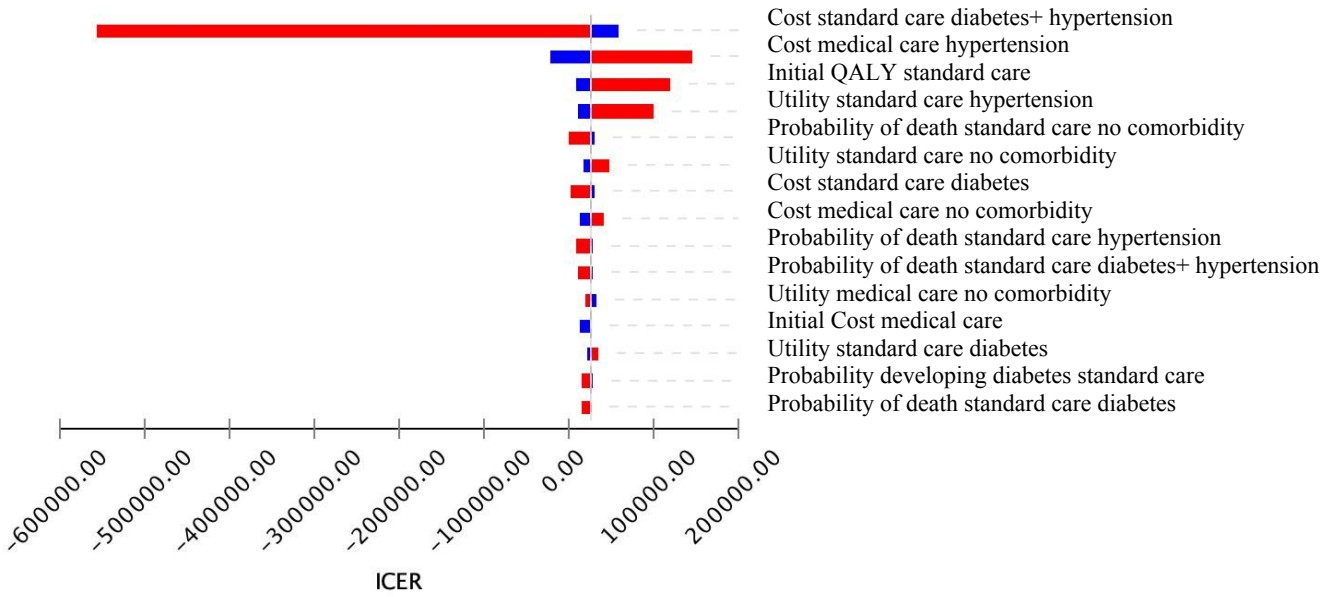

Lifetime Health Care Perspective

Tornado Diagram – ICER  
Surgery vs. Controls

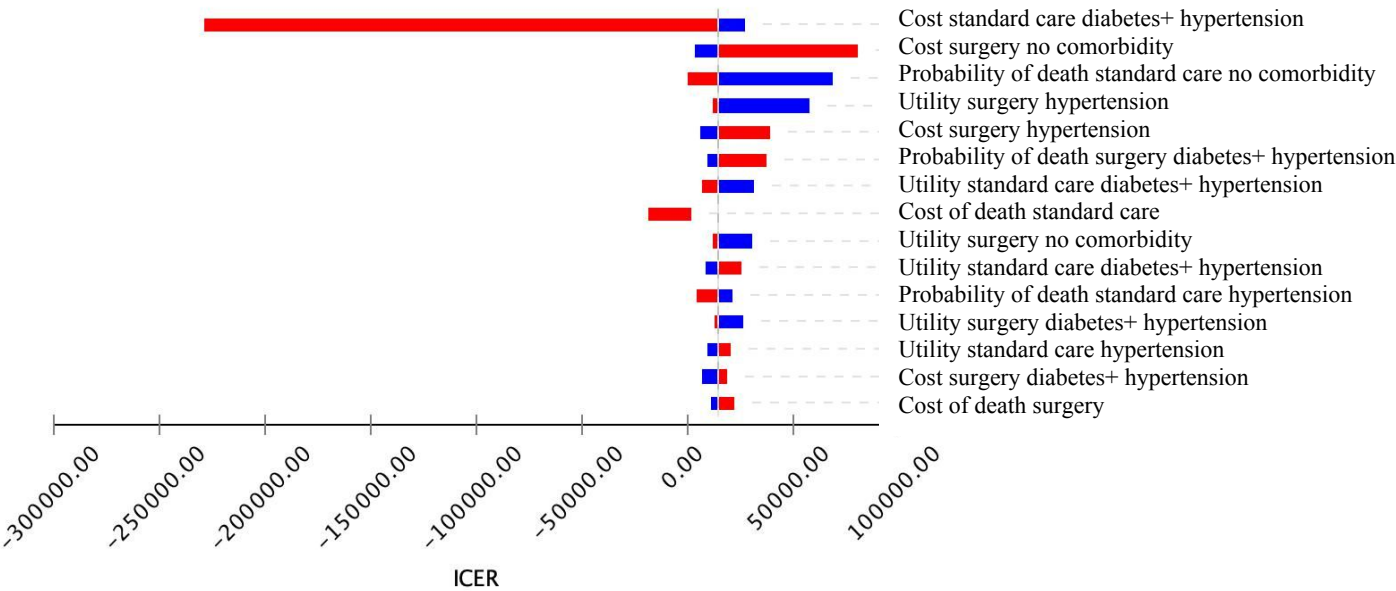

# Tornado Diagram – ICER Medical Therapy vs. Controls

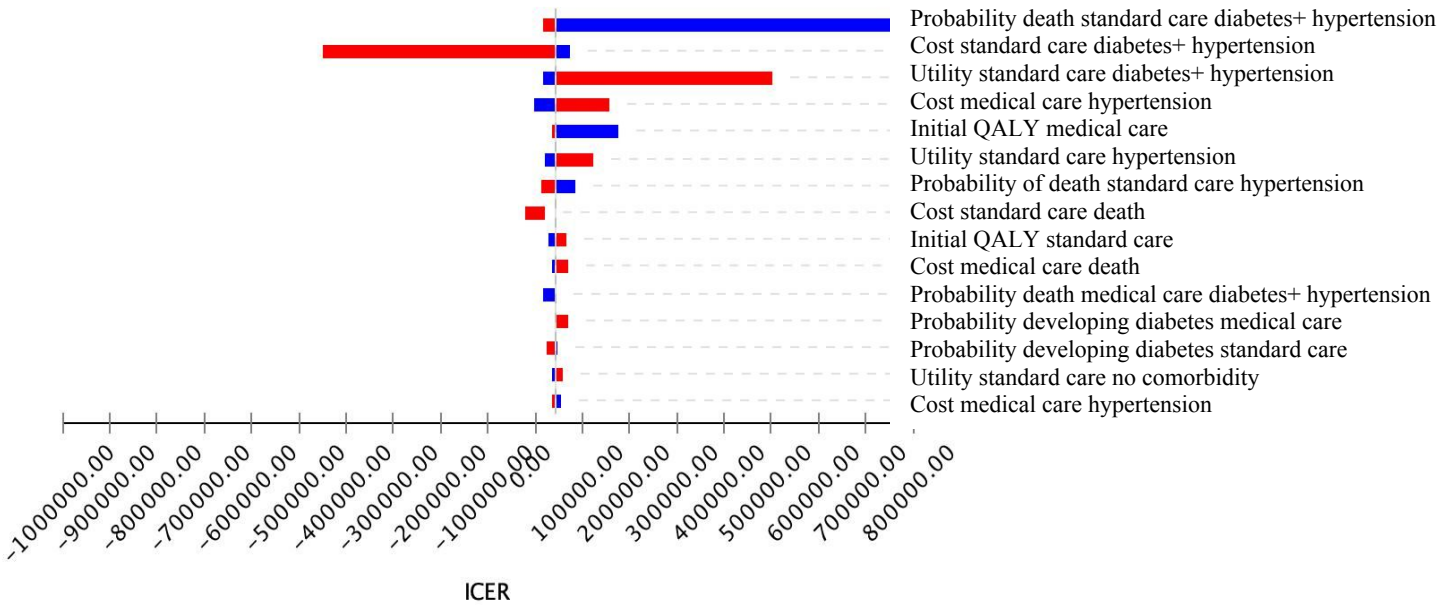

10 year Societal Perspective

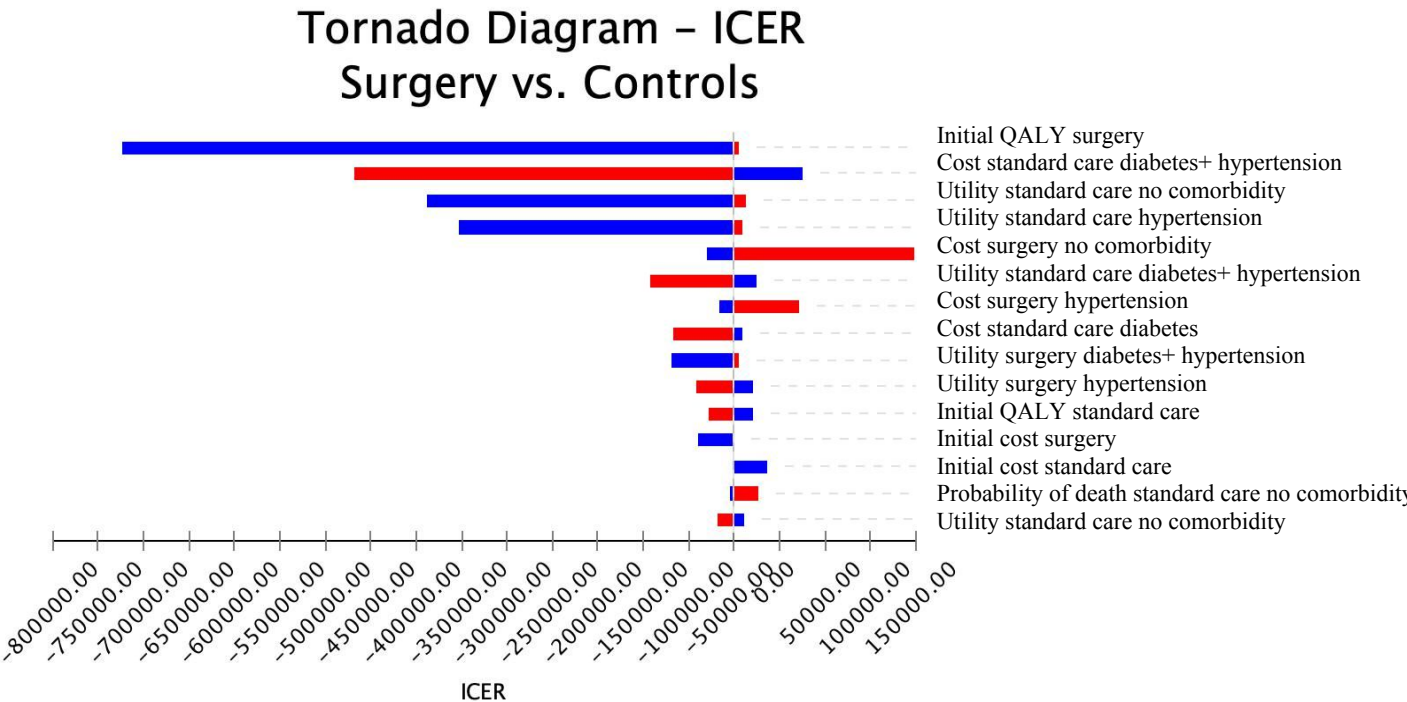

# Tornado Diagram – ICER Medical Therapy vs. Controls

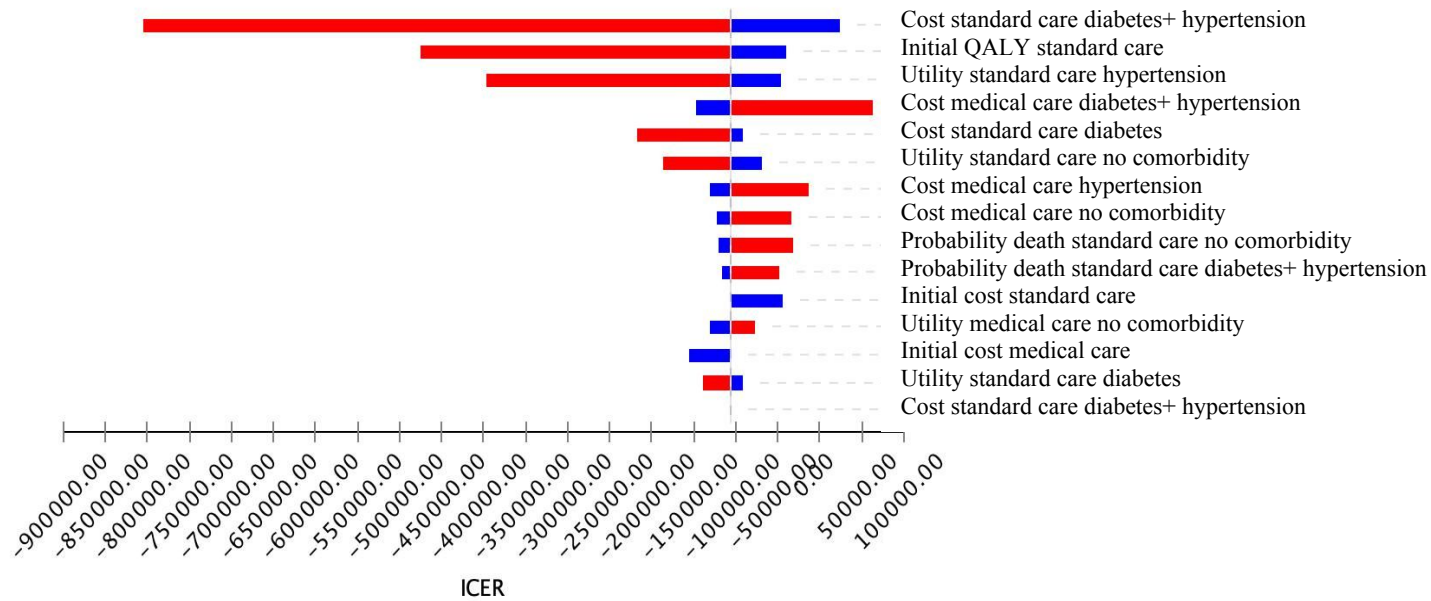

Lifetime Societal Perspective

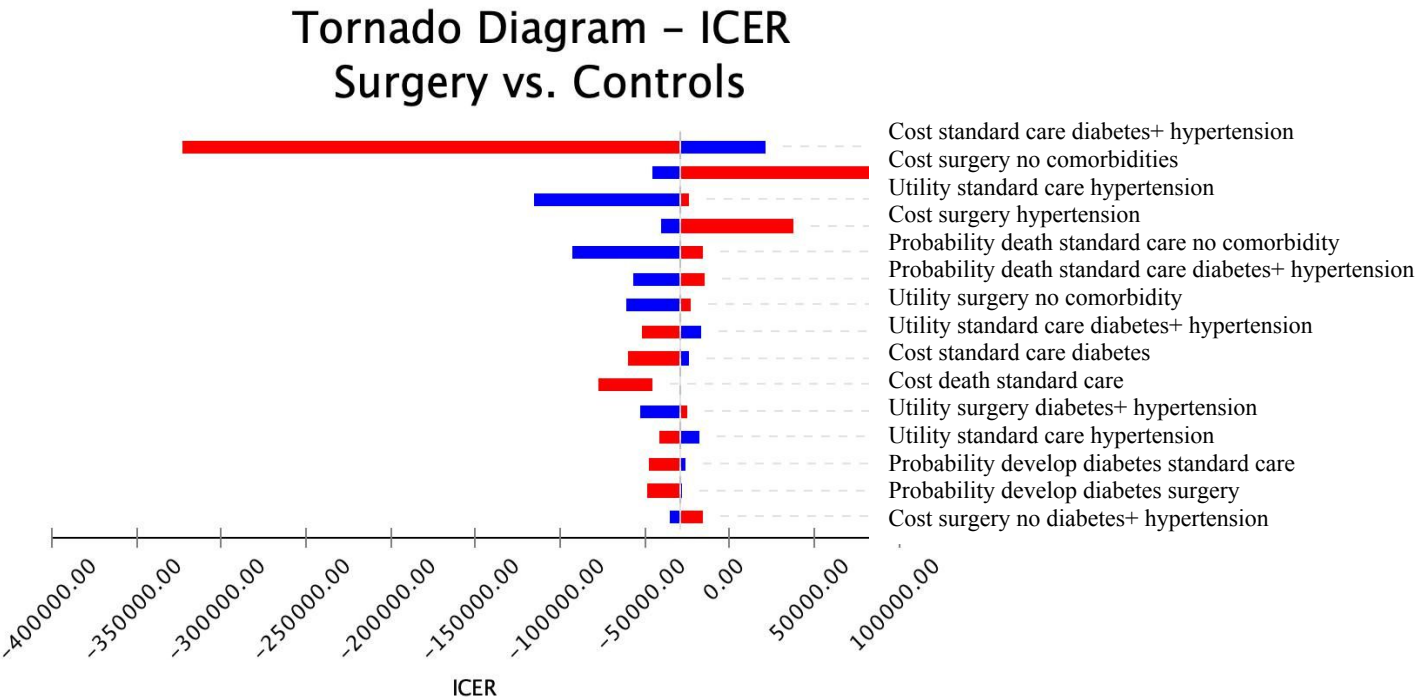

## Tornado Diagram – ICER Medical Therapy vs. Controls

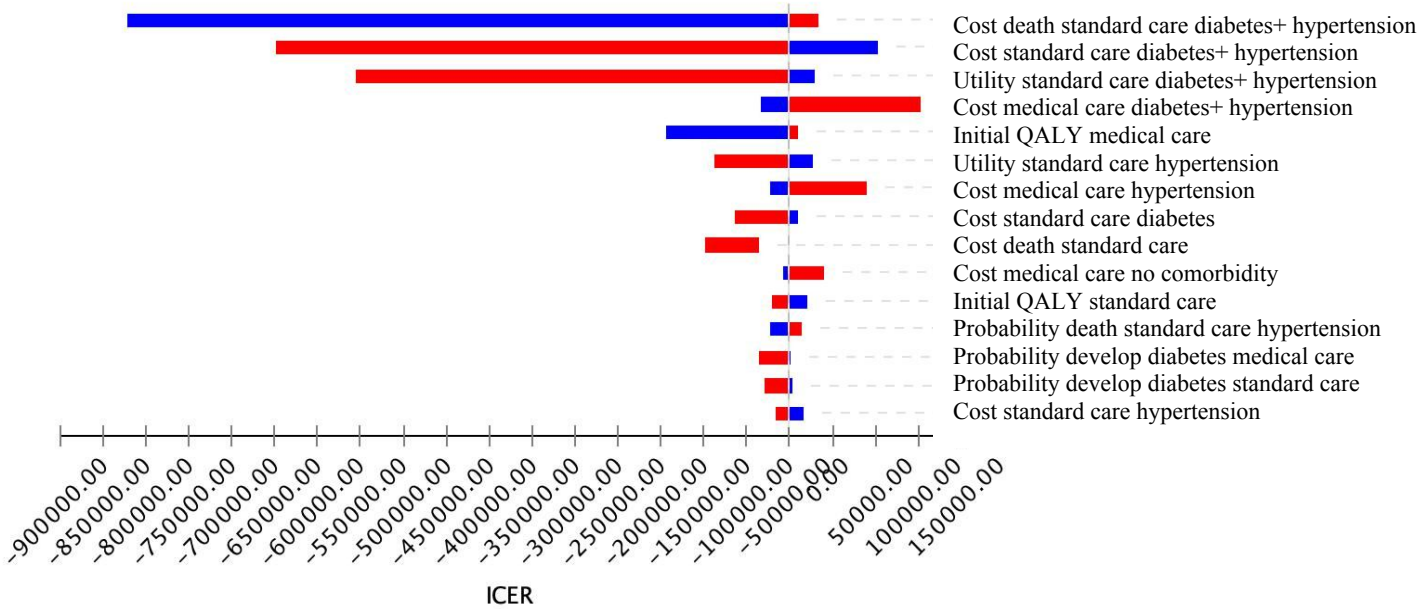

Supplement: 2020-0188-original-submission.pdf [file 2020-0188-original-submission.pdf]
